## ■ C O R R E C T I O N

# Chronic fatigue syndrome: the physiology of people on the low end of the spectrum of physical activity?

**Anton J. M. WAGENMAKERS**

Volume 97 (1999), pp. 611–613

The online data icon should not have been present on this paper as there is no additional online material.
